# Supplementary material for: NiP3: a promising negative electrode for Li- and Na-ion batteries
Source: Royal Society of Chemistry journal article supplement (doi:10.1039/c3ta13976j), 2013-10-24
Supplement: c3ta13976j.pdf [file c3ta13976j.pdf]

## **NiP<sub>3</sub>: A very promising negative electrode for Li- and Na-ion batteries.**

J.Fullenwarth,<sup>a</sup> A. Darwiche,<sup>a,b</sup> A. Soares,<sup>a</sup> B. Donnadieu<sup>a</sup> and L. Monconduit<sup>a,b</sup>

### **1) NiP<sub>3</sub> Rietveld refinement supporting information:**

The XRD data of the polycrystalline NiP<sub>3</sub> has been recorded in a glass capillary on the XPERTPro Panalytical two circles powder diffractometer in the Debye-Sherrer configuration and equipped with a Cu K<sub>alpha</sub> radiation. Single phase nature of NiP<sub>3</sub> has been confirmed by indexing the whole diffraction pattern and a whole-pattern decomposition (Lebail fitting) with constant scale factor and a pseudo-Voigt function profil was then applied using Fox software (**ref 1**). Rietveld refinement technique using Fullproff (**ref 2**) was conducted in order to verify the purity and secure a detailed structural analysis of NiP<sub>3</sub>. The presence of a very small amount of NiP<sub>2</sub> could have been identified, but owing to the very small quantity of this impurity present, the NiP<sub>2</sub> phase was not added in the Rietveld refinement process. The scale factor, zero point of detector, background parameters and lattice constants were refined in the first round, then peak shape and asymmetry parameters were added. Fractional coordinates of NiP<sub>3</sub> extracted from an X-Ray single crystal diffraction phase analysis were introduced and refined with an overall Debye-Waller for Ni and P atoms. Quality of the data was good enough to turn overall temperature factors into individual thermal isotropic parameters and refine the occupancy factors as well. Finally, instrumental or physical aberration corrections were added to the least squares refinement by using parameters sycos and sysin. Results of refinement are depicted below as supplementary information.

### Rietveld refinement pattern and the corresponding refinement for NiP<sub>3</sub>:

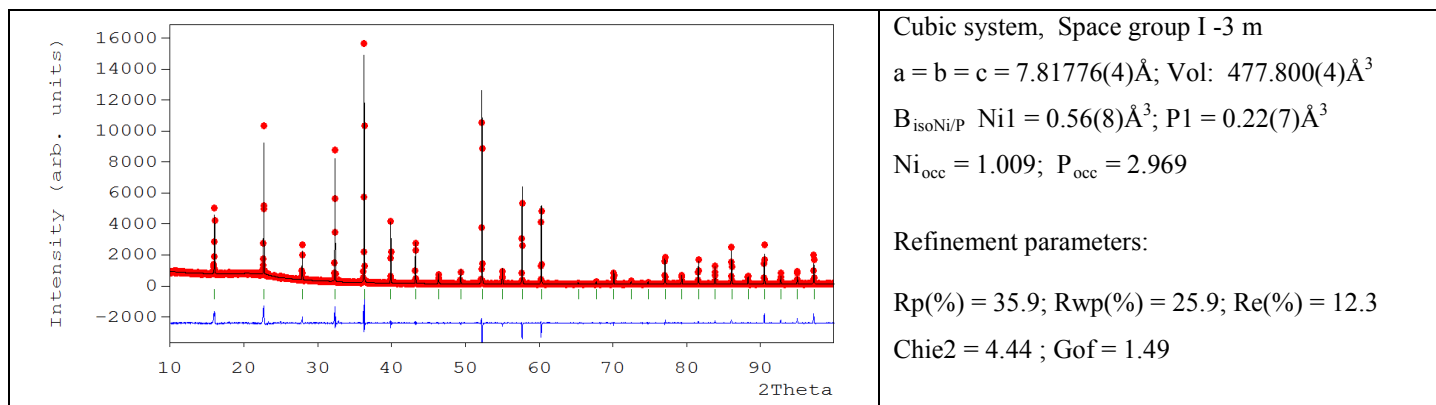

### References:

- 1 J. Appl. Cryst. 35 (2002), 734-743, V. Favre-Nicolin and R. Cerny, Fox, 'Free objects for crystallography': a modular approach to ab initio structure determination from powder diffraction.
- 2 Fullprof 2000 version July 2001, Juan Rodriguez-Carvajal, Laboratoire Leon Brillouin (CEA-CNRS), 91191 Gif sur Yvette Cedex, France.
